# Supplementary material for: Multi-platform profiling of over 2000 sarcomas: Identification of biomarkers and novel therapeutic targets
Source: PubMed Central journal article supplement (PMC4494935; doi:10.18632/oncotarget.3498), 2015-03-26
Supplement: oncotarget-06-12234-s001.pdf [file oncotarget-06-12234-s001.pdf]

## SUPPLEMENTARY TABLES

## Supplementary Table S1. IHC by histology

## Supplementary Table S2. PD-1, PD-L1 expression by histology

| Histology                            |                | IHC PD-1 | IHC PD-L1 |
|--------------------------------------|----------------|----------|-----------|
| All ( <i>n</i> = 2539)               | Total Positive | 120      | 126       |
|                                      | Total Cases    | 219      | 221       |
|                                      | % Positive     | 54.8     | 57.0      |
| Angiosarcoma ( <i>n</i> = 77)        | Total Positive | 4        | 3         |
|                                      | Total Cases    | 6        | 6         |
|                                      | % Positive     | 66.7     | 50.0      |
| Chondrosarcoma ( <i>n</i> = 97)      | Total Positive | 0        | 12        |
|                                      | Total Cases    | 16       | 16        |
|                                      | % Positive     | 0.0      | 75.0      |
| Chordoma ( <i>n</i> = 24)            | Total Positive | 1        | 1         |
|                                      | Total Cases    | 1        | 1         |
|                                      | % Positive     | 100.0    | 100.0     |
| Desmoid ( <i>n</i> = 43)             | Total Positive | 2        | 4         |
|                                      | Total Cases    | 5        | 5         |
|                                      | % Positive     | 40.0     | 80.0      |
| DSRCT ( <i>n</i> = 36)               | Total Positive | 0        | 1         |
|                                      | Total Cases    | 0        | 1         |
|                                      | % Positive     | 0.0      | 100.0     |
| EHE ( <i>n</i> = 14)                 | Total Positive | 1        | 1         |
|                                      | Total Cases    | 1        | 1         |
|                                      | % Positive     | 100.0    | 100.0     |
| Epithelioid sarcoma ( <i>n</i> = 19) | Total Positive | 1        | 0         |
|                                      | Total Cases    | 1        | 1         |
|                                      | % Positive     | 100.0    | 0.0       |
| ESS ( <i>n</i> = 91)                 | Total Positive | 5        | 6         |
|                                      | Total Cases    | 9        | 9         |
|                                      | % Positive     | 55.6     | 66.7      |
| Ewing's sarcoma ( <i>n</i> = 83)     | Total Positive | 1        | 2         |
|                                      | Total Cases    | 7        | 7         |
|                                      | % Positive     | 14.3     | 28.6      |
| Leiomyosarcoma ( <i>n</i> = 751)     | Total Positive | 31       | 19        |
|                                      | Total Cases    | 58       | 60        |
|                                      | % Positive     | 53.4     | 31.7      |

(Continued)

| Histology                                  |                | IHC PD-1 | IHC PD-L1 |
|--------------------------------------------|----------------|----------|-----------|
| Liposarcoma ( <i>n</i> = 220)              | Total Positive | 17       | 23        |
|                                            | Total Cases    | 31       | 30        |
|                                            | % Positive     | 54.8     | 76.7      |
| Myxoid ( <i>n</i> = 46)                    | Total Positive | 2        | 6         |
|                                            | Total Cases    | 6        | 6         |
|                                            | % Positive     | 33.3     | 100.0     |
| Dedifferentiated ( <i>n</i> = 77)          | Total Positive | 7        | 9         |
|                                            | Total Cases    | 12       | 11        |
|                                            | % Positive     | 58.3     | 81.8      |
| Well-differentiated ( <i>n</i> = 31)       | Total Positive | 2        | 3         |
|                                            | Total Cases    | 3        | 3         |
|                                            | % Positive     | 66.7     | 100.0     |
| Pleomorphic ( <i>n</i> = 30)               | Total Positive | 3        | 2         |
|                                            | Total Cases    | 4        | 4         |
|                                            | % Positive     | 75.0     | 50.0      |
| MPNST ( <i>n</i> = 36)                     | Total Positive | 1        | 2         |
|                                            | Total Cases    | 3        | 3         |
|                                            | % Positive     | 33.3     | 66.7      |
| Osteosarcoma ( <i>n</i> = 95)              | Total Positive | 5        | 4         |
|                                            | Total Cases    | 7        | 7         |
|                                            | % Positive     | 71.4     | 57.1      |
| Rhabdomyosarcoma ( <i>n</i> = 82)          | Total Positive | 6        | 5         |
|                                            | Total Cases    | 8        | 8         |
|                                            | % Positive     | 75.0     | 62.5      |
| Embryonal ( <i>n</i> = 9)                  | Total Positive | 0        | 0         |
|                                            | Total Cases    | 1        | 1         |
|                                            | % Positive     | 0.0      | 0.0       |
| Pleomorphic ( <i>n</i> = 19)               | Total Positive | 2        | 1         |
|                                            | Total Cases    | 2        | 2         |
|                                            | % Positive     | 100.0    | 50.0      |
| Solitary fibrous tumor<br>( <i>n</i> = 56) | Total Positive | 4        | 3         |
|                                            | Total Cases    | 5        | 5         |
|                                            | % Positive     | 80.0     | 60.0      |
| Synovial sarcoma ( <i>n</i> = 70)          | Total Positive | 1        | 1         |
|                                            | Total Cases    | 4        | 4         |
|                                            | % Positive     | 25.0     | 25.0      |

(Continued)

| Histology               |                | IHC PD-1 | IHC PD-L1 |
|-------------------------|----------------|----------|-----------|
| UPS ( <i>n</i> = 166)   | Total Positive | 7        | 7         |
|                         | Total Cases    | 10       | 10        |
|                         | % Positive     | 70.0     | 70.0      |
| Other ( <i>n</i> = 454) | Total Positive | 33       | 32        |
|                         | Total Cases    | 47       | 47        |
|                         | % Positive     | 70.2     | 68.1      |

DSRCT = desmoplastic small round cell tumor, EHE = epithelioid hemangioendothelioma ESS = endometrial stromal sarcoma, LMS = leiomyosarcoma, UPS = undifferentiated pleomorphic sarcoma, MPNST = malignant peripheral nerve sheath tumor, SFT = solitary fibrous tumor.

### Supplementary Table S3. DNA sequencing by histology
